1 **Intergenerational Effects of Early Life Starvation on Life-History, Consumption,**  
2 **and Transcriptome of a Holometabolous Insect**

3

4 Sarah Catherine Paul<sup>1,a</sup>, Pragya Singh<sup>1,a</sup>, Alice B. Dennis<sup>2</sup>, Caroline Müller<sup>1\*</sup>

5

6 <sup>1</sup>Chemical Ecology, Bielefeld University, Universitätsstr. 25, 33615 Bielefeld,  
7 Germany

8 <sup>2</sup>Evolutionary Biology & Systematic Zoology, University of Potsdam, Karl-Liebknecht-  
9 Strasse 24-25, 14476 Potsdam

10 <sup>a</sup> shared first authorship

11 \*corresponding author: [caroline.mueller@uni-bielefeld.de](mailto:caroline.mueller@uni-bielefeld.de)

12

13 Mail addresses: SCP: [sarahcatherinepaul@gmail.com](mailto:sarahcatherinepaul@gmail.com), PS:

14 [pragya.singh42019@gmail.com](mailto:pragya.singh42019@gmail.com), ABD: [alicebdennis@gmail.com](mailto:alicebdennis@gmail.com), CM:

15 [caroline.mueller@uni-bielefeld.de](mailto:caroline.mueller@uni-bielefeld.de)

16 *The authors wish to be identified to the reviewers*

17

18 **Running title:** Intergenerational effects on sawfly

19

20 **Keywords**

21 Intergenerational effects, sawfly, starvation, transcriptome, parental effects,  
22 compensatory growth.

23

24 **Number of words in the text:** 6,414

25

26 **List of all elements of the manuscript:** Main text, 1 Table, 5 Figures,

27 Supplementary Material

28 **ABSTRACT:** Intergenerational effects, also known as parental effects in which the  
29 offspring phenotype is influenced by the parental phenotype, can occur in response  
30 to factors that occur not only in early but also in late parental life. However, little is  
31 known about how these parental life stage-specific environments interact with each  
32 other and with the offspring environment to influence offspring phenotype, particularly  
33 in organisms that realize distinct niches across ontogeny. We examined the effects of  
34 parental larval starvation and adult reproductive environment on offspring traits under  
35 matching or mismatching offspring larval starvation conditions using the  
36 holometabolous, haplo-diploid insect *Athalia rosae* (turnip sawfly). We show that the  
37 parental larval starvation treatment had trait-dependent intergenerational effects on  
38 both life-history and consumption traits of offspring larvae, partly in interaction with  
39 offspring conditions and sex, while there was no significant effect of parental adult  
40 reproductive environment. In addition, while offspring larval starvation led to  
41 numerous gene- and pathway-level expression differences, parental larval starvation  
42 impacted fewer genes and only the ribosomal pathway. Our findings reveal that  
43 parental starvation evokes complex intergenerational effects on offspring life-history  
44 traits, consumption patterns as well as gene expression, although the effects are less  
45 pronounced than those of offspring starvation.

46

47

## Introduction

48 Intergenerational effects, more commonly known as parental effects, are defined as  
49 causal influences of parental phenotype on offspring phenotype, likely mediated by  
50 non-DNA sequence-based inheritance (Wolf and Wade 2009; Perez and Lehner  
51 2019). Together with transgenerational effects, which occur across several  
52 generations, they play a key role in the ecology and evolution of organisms (Badyaev  
53 and Uller 2009) and impact the responses of individuals to changing environmental  
54 conditions (Sánchez-Tójar et al. 2020). One important environmental factor that can  
55 rapidly change during an organism's lifetime and across generations is food  
56 availability. Periods of starvation are commonly encountered by insects in the wild  
57 (Jiang et al. 2019) and, when experienced early in life, often have long-lasting  
58 consequences on an individual's phenotype (Miyatake 2001; Wang et al. 2016;  
59 McCue et al. 2017) and the phenotype of the offspring (Saastamoinen et al. 2013;  
60 McCue et al. 2017; Paul et al. 2019). However, it is also becoming increasingly  
61 apparent that to fully elucidate the adaptive nature of intergenerational effects,  
62 studies should encompass different phases in development of the parental life cycle  
63 and how such life stage-specific experience affects offspring phenotype (English and  
64 Barreux 2020).

65 The conditions experienced particularly during two phases of parental life, early life  
66 and later life during mating and reproduction, can have lasting, sometimes  
67 irreversible impacts on development trajectories of offspring (Monaghan 2008; Burton  
68 and Metcalfe 2014; Taborsky 2017). A favorable environment experienced in early  
69 life may result in better conditioned offspring (van de Pol et al. 2006) that can better  
70 cope with stress (Franzke and Reinhold 2013). This is often called silver spoon or  
71 carry-over effect (Monaghan 2008). Negative effects of a poor start in life might also  
72 be passed on, resulting in offspring less able to cope with stressful conditions  
73 (Naguib et al. 2006). Alternatively, such stressed individuals may produce offspring

74 that are buffered against stressors, for example, through parental provisioning  
75 (Valtonen et al. 2012; Pilakouta et al. 2015; Hibshman et al. 2016). Finally,  
76 regardless of how favorable conditions are, it may be most important that they match  
77 between parents and offspring. Evidence for such predictive adaptive effects has  
78 been found in several species (Raveh et al. 2016; Le Roy et al. 2017), but is weak in  
79 others (Uller et al. 2013). Each of these trajectories of intergenerational effects are  
80 not mutually exclusive. For example, offspring in mismatched environments may do  
81 relatively better if their parents were of high quality, due to silver spoon effects  
82 (Engqvist and Reinhold 2016). Furthermore changes in parental investment based on  
83 mate cues (Cunningham and Russell 2000; Cornwallis and O'Connor 2009) may  
84 potentially counteract or augment the effects of the parental early life environment on  
85 offspring phenotype. As niches often shift across an individual's lifetime, both  
86 parental early and later life environments and their interaction must be considered as  
87 factors that can influence offspring phenotypes.

88 With discrete phases during development, insects, particularly holometabolous  
89 insects, present ideal organisms in which to investigate how environmental cues  
90 experienced during early life but also during adulthood (e.g. mating) may interact with  
91 offspring environment, to influence individual offspring phenotypes (English and  
92 Barreaux 2020). Periods of larval starvation are known to influence developmental  
93 trajectories with knock-on effects on adult size, reproductive success and adult  
94 starvation resistance (Boggs and Niitepõld 2016; Wang et al. 2016). Individuals may  
95 respond to periods of starvation with increased food uptake (Regalado et al. 2017) as  
96 well as compensatory growth (i.e. a faster growth rate) or catch-up growth (i.e.  
97 attaining a minimum size by prolonging the larval development) (Hector and  
98 Nakagawa 2012). Moreover, starvation leads to substantial shifts in gene expression  
99 (Moskalev et al. 2015; Jiang et al. 2019; Etebari et al. 2020; Farahani et al. 2020).  
100 However, little is known about how long these effects may persist (McCue et al.

101 2017) and to what extent parental starvation may affect gene expression of offspring  
102 experiencing matching or mismatching conditions.

103 In the present study, we investigated the effects of parental larval starvation and  
104 parental reproductive environment on offspring (i.e. intergenerational effects), under  
105 matching or mismatching larval starvation conditions, using the turnip sawfly, *Athalia*  
106 *rosae* (Hymenoptera: Tenthredinidae). The larvae feed on leaves of various species  
107 of Brassicaceae, including crops, and can readily experience periods of starvation  
108 when their hosts are overexploited (Riggert 1939). The adults are nectar-feeding and  
109 in addition collect neo-clerodanoid-like compounds (hereafter called 'clerodanoids')  
110 from non-Brassicaceae plants. Clerodanoid-uptake improves their mating probability  
111 (Amano et al. 1999) and affects interactions between and within sexes (preprint Paul  
112 et al. 2021; preprint Paul and Müller 2021). This behavior is thus an important aspect  
113 of the adult life-history, but potential influences on offspring life-history traits have, to  
114 our knowledge, not yet been studied. We measured key life-history traits (i.e.,  
115 developmental time and adult body mass) to assess the combined and interactive  
116 effects of parental and offspring larval resource availability and parental clerodanoid  
117 exposure on the offspring. Moreover, we measured effects of parental and offspring  
118 larval starvation on consumption and gene expression of offspring. We predicted that  
119 1) there are stronger intragenerational than intergenerational effects of larval  
120 starvation treatment on all parameters measured; 2) matching conditions between  
121 parental and offspring starvation treatment are beneficial, while a mismatch leads to  
122 a reduced performance, with silver spoon or parental buffering effects potentially  
123 augmenting or dampening any mismatch effects; 3) clerodanoid exposure increases  
124 parental investment in offspring due to an enhanced mate attractiveness, leading to  
125 positive effects for the offspring (in terms of a faster development and higher body  
126 mass).

127

128

## Materials and Methods

129

### *Set-Up of Insect Rearing and Plant Cultivation*

130 Adults of *A. rosae* (F0) were collected in May 2019 at two locations (population A:  
131 52°02'48.0"N 8°29'17.7"E, population B: 52°03'54.9"N 8°32'22.2"E). These  
132 individuals were reared for further two generations to reduce the impact of parental  
133 and grand-parental effects using a desing that minimized inbreeding (for details of  
134 breeding design see S1) White mustard (*Sinapis alba*) was provided for oviposition  
135 and Chinese cabbage (*Brassica rapa* var. *pekinensis*) as food plant. Adults of the F2  
136 generation were kept individually in Petri dishes and provided with a honey:water  
137 mixture (1:50). *Athalia rosae* is haplodiploid, i.e. virgin females produce male  
138 offspring (Naito and Suzuki 1991). To increase the likelihood of gaining similar  
139 numbers of females and males, mated as well as virgin females were placed  
140 individually into boxes (25 x 15 x 10 cm). They were supplied with a middle-aged leaf  
141 of non-flowering cabbage plants for oviposition and a honey:water mixture, which  
142 was replenished daily. Females were removed from the boxes after one week and  
143 their offspring used to set up the experimental generations. Experimental rearing and  
144 consumption assays were carried out in a climate chamber (20 °C:16 °C, 16 h: 8 h  
145 light:dark, 70% r.h.).

146 Plants of *S. alba* and *B. rapa* were grown from seeds (Kiepenkerl, Bruno Nebelung  
147 GmbH, Konken, Germany) in a greenhouse (20 °C, 16 h: 8 h light:dark, 70% r.h.) and  
148 a climate chamber (20 °C, 16 h: 8 h light:dark, 70% r.h.). Plants of *Ajuga reptans*  
149 used for clerodanoid supply were grown from seeds (RHS Enterprise Ltd, London,  
150 UK) in the greenhouse and transferred outside in late spring once about 2 months  
151 old. Middle-aged leaves of plants that were about 8 month old were offered to adults.

152

153

### *Experimental Overview and Measurements of Life-History Data*

154 We conducted a fully factorial experiment where we manipulated the parental larval  
155 environment (parental larval starvation), the parental reproductive environment  
156 (exposure to clerodanoids) and the offspring environment (offspring larval starvation)  
157 (Fig. 1). The experimental generations were reared to test the effects of parental and  
158 offspring larval starvation, and their interaction with the adult reproductive  
159 environment on the offspring phenotype. On the day of hatching, larvae of the  
160 parental generation were individually placed into Petri dishes (5.5 cm diameter) with  
161 moistened filter paper and *B. rapa* leaf discs cut from 7-10 week old plants, which  
162 were replaced daily. Per maternal line, larvae were split equally between one of two  
163 larval starvation treatments, no starvation (N) or starvation (S). For starvation,  
164 individuals were starved twice for 24 h, first the day after moulting into 2<sup>nd</sup> instar and  
165 second on the day of moulting into 4<sup>th</sup> instar to minimize early mortality whilst  
166 mimicking the food deprivation larvae may experience when occurring in high  
167 densities (Riggert 1939). Larval instars were tracked by checking daily for the  
168 presence of exuviae.

169 Eonymphs were placed in soil for pupation. Adults were kept individually in Petri  
170 dishes and provided with honey:water mixture. From the parental generation, pairs of  
171 non-sib females and males reared under the same larval starvation treatments were  
172 assigned to one of two reproductive environment treatments, where both parents  
173 either had clerodanoids (C+) or did not (C-). C+ individuals were exposed to a leaf  
174 section (1 cm<sup>2</sup>) of *A. reptans* for 48 h prior to mating, giving individuals time to take  
175 up clerodanoids (preprint Paul et al. 2021). Mated females (2-9 days old) from each  
176 of these four treatments (NC-, NC+, SC-, SC+) and C- virgin females (NC-, SC-)  
177 were then placed in individual breeding boxes. Their offspring were distributed to  
178 offspring starvation treatments (N or S) that matched the parental starvation  
179 treatment or differed from it (mismatch) (Fig. 1). In both generations, larval, pupal,  
180 and total development time (from larva to adult) as well as the adult body mass at the

181 day of emergence (Sartorius AZ64, M-POWER Series Analytical Balance, Göttingen,  
182 Germany) were recorded for each individual. In total 358 larvae of the parental  
183 generation (177 females, 181 males) and 484 larvae of the offspring generation (282  
184 females, 202 males) reached adulthood, out of the 607 and 688 larvae, respectively,  
185 that were reared in each generation.

186

187

### *Consumption Assays*

188 To test effects of parental and offspring larval starvation experience on offspring  
189 consumption, assays were performed with larvae of the offspring generation at the  
190 start of the 3<sup>rd</sup> instar (directly after the first starvation event), measuring the relative  
191 growth rate, relative consumption rate, and efficiency of conversion of ingested food.  
192 The 3<sup>rd</sup> instar was chosen to test the consumption not directly after a starvation event  
193 to avoid any potential interference with physiological changes directly induced by the  
194 starvation. Each larva was weighed at the beginning of the consumption assays (=   
195 initial body mass) (ME36S, accuracy 0.001 mg; Sartorius, Göttingen, Germany) and  
196 provided with four fresh discs cut from middle-aged leaves (surface area of 230.87  
197 mm<sup>2</sup> per disc) on moistened filter paper. After 24 hours, larvae were weighed again  
198 (= final body mass) and the leaf disc remains scanned (Samsung SAMS M3375FD,  
199 resolution 640 x 480). In that period, none of the leaf discs showed signs of wilting.  
200 The total area of leaf consumed (mm<sup>2</sup>) was then calculated as the difference  
201 between the average leaf area and the remaining leaf area. Leaf discs somewhat  
202 differ in mass but mass is likely more affected by different water contents than  
203 surface area.

204

205

### *Statistical Analyses*

206 All data were analyzed using R 4.0.2 (2020-06-22). We set  $\alpha = 0.05$  for all tests and  
207 checked model residuals for normality and variance homogeneity. All linear mixed



208 effects models were run in lme4 using maximum likelihood. Stepwise backwards  
209 deletion using Chi<sup>2</sup> ratio tests (package:MASS; version 7.3-53.1) for the life history  
210 traits and, due to the much smaller sample sizes (Luke 2017), conditional *F*-tests with  
211 *df* correction using Satterthwaite method (package lmerTest; version 3.1-3;  
212 Kuznetsova et al. 2017) for the consumption analyses were employed to reach the  
213 minimum adequate model (Crawley 2012). Posthoc analyses were carried out using  
214 the package 'multcomp' (version 1.4-13; Hothorn et al. 2008). Post data entry, raw  
215 data were visually inspected thrice, all variables plotted and outliers and possible  
216 anomalies in the data (e.g. strings of similar values) interrogated  
217 (package:pointblank; version 0.6.0). Intragenerational effects of starvation on life-  
218 history traits of individuals of the parental generation were tested as described in S1.

219 In *A. rosae*, usually 6 instars for female and 5 instars for males are found (Sawa et  
220 al. 1989). Due to observations made during the experiment (no *a priori* hypothesis),  
221 we tested in the offspring generation whether the likelihood of an additional larval  
222 instar (7 for females and 6 for males) differed based on offspring larval starvation  
223 treatment (independent of parental treatments) using a binomial generalized linear  
224 mixed model (package: lme4), where the predictor was offspring starvation treatment  
225 and parental pair was included as a random effect. The effects of the parental larval  
226 starvation treatment, parental clerodanoid exposure, offspring starvation treatment  
227 and their interaction on larval, pupal and total developmental time as well as adult  
228 mass of offspring individuals were assessed in separate linear mixed effects models  
229 (lmm), with parental pair included as a random effect (controlling for non-  
230 independence of sibling larvae). Female and male data were analyzed separately to  
231 enable model convergence.

232 Relative growth rate, relative consumption rate, and food conversion efficiency of  
233 larvae of the offspring generation were analyzed using lmm. We excluded the  
234 parental clerodanoid exposure as a predictor variable from the consumption assay

235 analysis due to the low number of individuals in certain treatments (Fig. 1) and  
236 analyzed male and female data separately as above. To assess variation in relative  
237 growth rate, the change in larval body mass [final mass — initial mass] was used as  
238 the response variable and initial larval body mass, parental starvation treatment,  
239 offspring starvation treatment, and the interactions between all the predictors. To  
240 assess relative consumption rate, we used the total area of consumed leaf material  
241 as the response variable and initial larval body mass, parental starvation treatment,  
242 offspring starvation treatment, and both their three-way and two-way interactions as  
243 the predictors. Finally, for food conversion efficiency the change in larval body mass  
244 was taken as the response variable and the total area of consumed leaf material,  
245 parental starvation treatment, offspring starvation treatment, and the interactions  
246 between all the predictors. Parental pair was included in all three models as a  
247 random effect.

248

#### 249 *Sample Collection and Sequencing*

250 A total of 24 male larvae (4<sup>th</sup> instar, 9 d old), comprising six biological replicates per  
251 treatment level (parent/offspring treatment: N/N, N/S, S/N, S/S, all C-, Fig. 2), were  
252 collected to investigate the effects of parental and offspring starvation treatment on  
253 gene expression in larvae of the offspring generation. Individuals were chosen in a  
254 way that maximized the equal spread of siblings across treatments and frozen at -80  
255 °C prior to extraction. RNA was extracted with an Invitrogen PureLink™ RNA Mini Kit  
256 (ThermoFisher Scientific, Germany), including a DNase step (innuPREP DNase I Kit,  
257 analyticJena, Jena, Germany). RNA quality was assessed on a bioanalyzer 2100  
258 (Agilent, CA, United States) and Xpose (PLT SCIENTIFIC SDN. BHD, Malaysia).  
259 Library preparation (Ribo-Zero for rRNA removal) and sequencing (NovaSeq6000  
260 and S4 Flowcells, Illumina, CA, United States) were provided by Novogene  
261 (Cambridge, UK). Sequence quality before and after trimming was assessed using

262 FastQC (v. 0.11.9; Andrews 2010). After short (< 75 bp), low quality (Q < 4, 25 bp  
263 sliding window), and adapter sequences were removed using Trimmomatic (Bolger et  
264 al. 2014), more than 98% of reads remained.

265

### 266 *Differential Expression Analysis*

267 Cleaned reads were mapped to the annotated genome of *A. rosae*, version AROS  
268 v.2.0 (GCA\_000344095.2) with RSEM v1.3.1 (Li and Dewey 2011), which  
269 implemented mapping with STAR v2.7.1a (Dobin et al. 2013). Analysis of differential  
270 gene expression was conducted with DESeq2 (version 1.28.1; Love et al. 2014). The  
271 results of mapping with RSEM were passed to DESeq2 for gene-level analyses using  
272 Tximport (version 1.16.1; Soneson et al. 2015). Prior to analysis, genes with zero  
273 counts in all samples and those with low counts (< 10) in less than a quarter of  
274 samples (6) were excluded. Model fitting was assessed by plotting dispersion  
275 estimates of individual gene models and outlier samples were inspected using  
276 principle component analysis of all expressed genes and pairwise-distance matrices  
277 between samples. Expression was modelled based on the entire dataset, with the  
278 four levels representing the combination of parental.offspring starvation treatments:  
279 N.N, N.S, S.N, and S.S. Differential expression was assessed in four pairwise  
280 comparisons between the treatments: 1) N.N vs N.S and 2) S.N vs S.S were used to  
281 assess the effects of offspring starvation treatment for individuals whose parents  
282 experienced the same starvation treatment, whereas 3) N.N vs S.N and 4) N.S vs  
283 S.S were used to assess the effects of differing parental starvation treatment on  
284 individuals that experienced the same offspring starvation treatment. Significance  
285 was based on a Wald Test and shrunken log fold-change values with apeglm  
286 (version 1.10.1; Zhu et al. 2019). P-values were adjusted for multiple testing using  
287 Benjamini-Hochberg (Benjamini and Hochberg 1995) procedure with a false  
288 discovery rate of 0.05. Afterwards, significantly differentially expressed genes

289 (relatively up- or downregulated) were extracted and filtered with a p-adjust of < 0.05.  
290 A Venn diagram (Venn.Diagram, version 1.6.20) was used to depict the relationship  
291 between the significantly differentially expressed genes for each pairwise  
292 comparison. The expression of the significantly differentially expressed genes of  
293 each comparison was visualized in a heatmap using normalized counts scaled per  
294 gene (scale="row") (pheatmap, version 1.0.12).

295 To examine differential expression of genes with known roles in stress and/or  
296 starvation response, we searched specifically for a targeted list of genes within the  
297 significantly differentially expressed genes, based on their identity (from the genome  
298 annotations). For this, we used the keywords "heat shock protein" (and "hsp"),  
299 "cytochrome P450", "octopamine" and "tyramine" in the putative gene names.

300

### 301 *Pathway-Level Analysis of Differential Expression*

302 We used the KEGG (Kyoto Encyclopedia of Genes and Genomes) database to  
303 assign the predicted genes in the *A. rosae* genome to gene pathways using the  
304 KEGG Automatic Annotation Server (KAAS; Moriya et al. 2007) (S3). Of the  
305 annotated genes for which we had read counts, 65% were assigned to at least one  
306 KEGG pathway. A gene set enrichment analysis was then performed on the  
307 normalized counts using GAGE (Luo et al. 2009) and pathview (Luo and Brouwer  
308 2013) in R, applying an false discovery rate-adjusted *P*-value cut-off of < 0.05 to  
309 identify differentially expressed pathways. We derived the non-redundant significant  
310 gene set lists, meaning those that did not overlap heavily in their core genes, using  
311 *eset.gpr* and a *P*-value cut-off for the overlap between gene sets of  $10e^{-10}$ .

312 Unmapped reads were inspected to check for the differential expression of genes  
313 not present in the reference genome. These were extracted from the RSEM-  
314 produced BAM file using samtools view (Li et al. 2009) and converted to fastq (using  
315 bamtools bamtofastq; Barnett et al. 2011), and *de novo* assembled using Trinity

316 (default settings) (Grabherr et al. 2011). This assembly was done jointly with reads  
317 from additional samples (preprint Paul et al. 2021) to optimize coverage. The  
318 unmapped reads were mapped back to this reference and expected read counts  
319 extracted using eXpress (Roberts et al. 2011). Transcripts with >10,000 mapped  
320 reads were identified using BLASTN (default settings, limited to one match per gene  
321 and  $1e^{-1}$ ) against the NCBI nucleotide database. Differential expression of unmapped  
322 reads in the larval samples was carried out as for mapped reads (see above).

323

324

## Results

325

### *Life-History Traits*

326 Larval starvation in the parental generation had trait- and sex-specific effects on life-  
327 history, leading to a prolonged total development time for both sexes and a lower  
328 body mass in females (for details see S2). In the offspring generation, the exposure  
329 of parents to clerodanoids had no influence on any of the life-history parameters  
330 measured, whereas the effect of parental and offspring larval starvation treatment  
331 were trait- and sex-specific. Both females ( $Chi^2_1 = 11.06$ ,  $P < 0.001$ ) and males ( $Chi^2_1$   
332  $= 29.25$ ,  $P < 0.001$ ) were significantly more likely to have an additional larval instar  
333 prior to the eonymph stage if they were starved than if they were not starved (Fig. 2A,  
334 B) (analyzed independently of parental starvation treatment). There was an  
335 interactive effect of parental and offspring starvation treatment on both female ( $Chi^2_1$   
336  $= 10.37$ ,  $P = 0.001$ ) and male ( $Chi^2_1 = 4.89$ ,  $P = 0.027$ ) total development time, such  
337 that intra-generational starvation led to a longer development time for both sexes  
338 (Fig. 2C, D; S4A, S4B). Larval development of offspring females was only affected by  
339 offspring starvation treatment ( $Chi^2_1 = 319.40$ ,  $P < 0.001$ ; S4A), while there was an  
340 interactive effect of parental and offspring starvation treatment on male larval  
341 development time ( $Chi^2_1 = 6.60$ ,  $P = 0.010$ ; S4B, S5B). In contrast, for pupal  
342 developmental time there was an interactive effect of parental and offspring

343 starvation treatment on females ( $Chi^2_1 = 24.57$ ,  $P < 0.001$ , S4A, S5C), but only a  
344 significant effect of offspring starvation treatment on males ( $Chi^2_1 = 17.23$ ,  $P < 0.001$ ;  
345 S4D). Both parental ( $Chi^2_1 = 4.02$ ,  $P = 0.045$ ) and offspring starvation treatment  
346 ( $Chi^2_1 = 12.95$ ,  $P < 0.001$ ) independently influenced female adult mass, with offspring  
347 females having a lower mass if they were starved during development, but those  
348 females whose parents were starved had a higher overall mass than when parents  
349 had not starved (Fig. 2E). In contrast, male adult mass was significantly affected by  
350 the interaction between parental and offspring starvation treatment ( $Chi^2_1 = 4.58$ ,  $P =$   
351  $0.030$ , Fig. 2F). Male offspring of starved parents that themselves were not starved  
352 during development (S.N) had a higher mass than offspring that were starved (S.S)  
353 (pairwise comparison:  $z = -3.47$ ,  $P = 0.003$ , S4B).

354

#### 355 *Consumption*

356 Offspring starvation treatment had a significant interactive effect on the relationship  
357 between change in mass and initial body mass (relative growth rate) in offspring  
358 larvae in both females ( $F_{1,60.75} = 5.96$ ,  $P = 0.017$ ) and males ( $F_{1,39.54} = 7.32$ ,  $P =$   
359  $0.009$ ; S6a). The change in body mass of starved larvae increased more steeply with  
360 an increase in initial larval body mass compared to non-starved larvae for both sexes  
361 (Fig. 3A, B), indicating a higher relative growth rate in starved larvae. There was no  
362 effect of parental starvation treatment on relative growth rate on adults of both sexes  
363 (S6a). The relative consumption rate of females was affected by a significant  
364 interaction of initial larval body mass and parental starvation treatment on the area of  
365 leaf consumed ( $F_{1,62} = 6.15$ ,  $P = 0.015$ ; S6b), such that the leaf area consumed  
366 increased with initial body mass for individuals from non-starved parents but did not  
367 change for individuals from starved parents (Fig. 3C). Thus, larger female larvae  
368 consumed more than smaller larvae when their parents were not starved but not  
369 when their parents were starved. For males, only initial body mass had a significant

370 positive effect on the leaf area consumed (initial body mass:  $F_{1,41.45} = 21.97$ ,  $P <$   
371 0.001; S6b) across all treatments (Fig. 3D); i.e. there was no effect of parental or  
372 offspring starvation treatment on relative consumption rate. Regarding food  
373 conversion efficiency, leaf area consumed and offspring starvation treatment  
374 independently influenced change in body mass for both females (leaf area  
375 consumed:  $F_{1,54.12} = 7.17$ ,  $P = 0.009$ ; offspring starvation:  $F_{1,54.77} = 11.36$ ,  $P = 0.001$ )  
376 and males (leaf area consumed:  $F_{1,44} = 31.55$ ,  $P < 0.001$ ; offspring starvation:  $F_{1,44} =$   
377 6.92,  $P = 0.011$ ; S6c). The food conversion efficiency was higher when larvae were  
378 not starved than when they were starved, while under both conditions consuming  
379 more leaf material led to a higher body mass increase for larvae (Fig. 3E, F).

380

### 381 *Gene Expression*

382 Sequencing of the 24 individual larvae resulted in a total of 1.4 billion reads with an  
383 average of 58 million reads per sample (SE:  $\pm 2$  million reads) and an average GC  
384 content of 43%. Prior to normalization, the average number of mapped reads per  
385 sample was 33,675,600, equating to an average of 91% reads per sample aligned to  
386 the reference genome (range 85-93%).

387 Offspring starvation had the strongest effect on gene expression (Figs 4, 5, S7).  
388 The two comparisons between starved and non-starved larvae revealed 4727 (N.S vs  
389 N.N) and 5089 (S.N vs S.S) significantly differentially expressed genes (log fold-  
390 change  $> 0$ , adjusted  $P < 0.05$ ) and a large number of these overlapped between the  
391 two comparisons (4002). In contrast, there were far fewer significantly differentially  
392 expressed genes in the two comparisons in which the larvae had the same starvation  
393 treatment, namely 155 (S.N vs N.N) and 75 (N.S vs S.S). In the comparison between  
394 starved and non-starved larvae from non-starved parents, there was evidence of  
395 regulation in some genes known to be associated with stress response. There was  
396 significant downregulation of putative heat shock proteins (eight downregulated and



397 one upregulated) and upregulation of putative cytochrome P450 genes (21 genes  
398 upregulated, six downregulated) as well as upregulation of one octopamine and one  
399 tyramine. When parental starvation but not offspring starvation treatments differed,  
400 there was far less differential expression of such genes with only one or two  
401 cytochrome P450 genes being differentially expressed (S8, S9).

402 While the majority of reads mapped to the reference genome, 247,997,896 reads  
403 did not map. We assembled these into 334,717 transcripts; a large proportion of  
404 these (267,893 transcripts) were lowly transcribed (<50 reads). Of those genes that  
405 we assembled *de novo*, 803 were putatively annotated against the NCBI nt database  
406 and of these a large portion were mitochondrial (S10). Differential expression  
407 analysis of unmapped reads identified differentially expressed genes between the  
408 treatment pairs in a pattern mirroring the genes from the reference [1523 (N.S vs  
409 N.N), 1860 (S.N vs S.S), 149 (S.N vs N.N) and 34 (N.S vs S.S)]. Many of these were  
410 *A. rosae* genes linked to the mitochondria, particularly in the comparisons between  
411 starved and non-starved offspring individuals.

412 The pathway level analysis with KEGG identified between one and eight pathways  
413 that were differentially regulated in our four comparisons (S10). The only pathway  
414 that was present in all four comparisons was ko03010, encoding components of the  
415 ribosome. Interestingly, expression of ribosomal components was affected not only  
416 by differences in offspring starvation treatment but also by differences in parental  
417 starvation treatment. The pathway was upregulated in starved larvae when compared  
418 to larvae that were not starved (offspring treatment differed) and to larvae that were  
419 starved but whose parents were also starved (parental treatment differed), with the  
420 reverse trend for non-starved larvae (Table 1; S11). The other significantly  
421 differentially expressed KEGG pathways only occurred between individuals that  
422 differed in offspring but not parental larval starvation treatments, mirroring the gene  
423 expression results. These pathways belong to the four main categories: metabolic



424 breakdown and protein processing (pancreatic secretion, proteasome and protein  
425 processing in the endoplasmic reticulum), immune response (phagosome and  
426 antigen processing), energy production and central metabolic processes (citrate  
427 cycle, glycolysis, thyroid hormone signalling pathway), and ECM-receptor interaction.  
428 There was generally a downregulation of these processes in larvae that were starved  
429 compared to non-starved individuals.

430

431

## Discussion

432 We investigated the influence of intra- and intergenerational effects on offspring  
433 phenotype in the holometabolous insect *A. rosae*, which realizes distinct niches  
434 during its life-cycle. Our results revealed that offspring starvation interacted with  
435 parental starvation in a trait-and sex-specific manner, affecting the offspring  
436 phenotype. Such trait-specific and sex-specific effects of intergenerational treatments  
437 have been shown in previous studies (Zizzari et al. 2016; Le Roy et al. 2017; Wilson  
438 et al. 2019; Yin et al. 2019), suggesting that they may be common. Trait- and sex-  
439 specificity may result from differential and sex-specific directional selection on  
440 traits (Tarka et al. 2018; Yin et al. 2019).

441

442

### *Effects on Life-History*

443 In our study, larval starvation led to an increased probability of having an  
444 additional instar in *A. rosae* larvae of both sexes. Increasing the number of larval  
445 instars is a potentially adaptive strategy that allows individuals to recover from  
446 starvation via the prolongation of developmental time, e.g. by catch-up growth  
447 (Hector and Nakagawa 2012). Such intraspecific variation in the number of larval  
448 instars is common in insect species and can occur in response to various biotic and  
449 abiotic factors, including food quantity and quality (Esperk et al. 2007). Such variation

450 has also previously been identified in tenthredinid sawfly species (Esperk et al. 2007;  
451 Charles and Allan 2000), but has not been described, to our knowledge, in *A. rosae*.

452 In line with the increased larval instar numbers, offspring of *A. rosae* that were  
453 starved had a longer development time in both sexes. There was a trend for faster  
454 development times in offspring that experienced a similar environment as their  
455 parents, which was at least significant for female pupal development time and may  
456 be suggestive of positive effects of matching parental and offspring environmental  
457 conditions (Monaghan 2008), i.e. a match-mismatch scenario. Similar positive effects  
458 of matching parental and offspring dietary conditions have also been found in a  
459 number of species in response to food availability (Hibshman et al. 2016; Raveh et al.  
460 2016). However, other life history data of *A. rosae* did not reveal this match-mismatch  
461 pattern, indicating a complex interplay between different intergenerational effects.

462 Adult mass showed a different pattern than development time, with female  
463 offspring having a higher adult mass when their parents were starved as larvae  
464 irrespective of their own starvation conditions, indicative of enhanced parental  
465 provisioning to offspring of starved parents, i.e. parental buffering. Similarly, females  
466 of the vinegar fly, *Drosophila melanogaster*, reared on poor food had larger offspring  
467 than females reared on standard food (Valtonen et al. 2012). Life-history theory  
468 predicts that under hostile conditions there is a shift towards fewer but better  
469 provisioned offspring (Roff 1992), although we did not examine the number of  
470 offspring produced here. As neither larval developmental time for female *A. rosae* nor  
471 their consumption were affected by the parental starvation treatment, other  
472 physiological effects (discussed below for gene expression) may have mediated this  
473 kind of buffering. In contrast to females, only male offspring of starved parents  
474 differed significantly in adult mass, with starved sons weighing less. Thus, investment  
475 in body mass may be particularly low in males under repeatedly poor environmental  
476 conditions across generations, indicating “parental suffering” rather than buffering

477 (i.e. negative parental effects). The differential investment in sexes in dependence of  
478 the parental vs. offspring starvation may be related to the haplodiploidy of this sawfly  
479 species. For example, larger eggs are usually fertilized to become females while  
480 smaller eggs remain unfertilized and become males in the haplodiploid thrip,  
481 *Pezothrips kellyanus*, and such differences could increase under parental starvation  
482 conditions (Katlav et al., 2021). Overall, there was no clear indication of silver spoon  
483 effects for any of the measured life-history traits, but in match-mismatch designs such  
484 effects cannot be ruled out (Engqvist and Reinhold 2016).

485

#### 486 *Effects on Consumption*

487 Consumption assays revealed a different pattern than expected from the body  
488 mass patterns. Considering the larger body mass of female offspring from starved  
489 parents, we would have expected such individuals to have a higher growth rate,  
490 consume more leaf material, and/or have a higher consumption efficiency. Our  
491 results showed that parental starvation had no effect on any consumption trait except  
492 on relative consumption rate in females, where offspring of non-starved parents  
493 consumed more leaf material than that of starved parents, contrary to our  
494 expectation. Additionally, offspring that experienced starvation exhibited a steeper  
495 relative growth rate than non-starved larvae, suggesting compensatory growth  
496 (Hector and Nakagawa 2012). Combining this compensatory growth with a longer  
497 development period potentially allows starved individuals to become larger and to  
498 overcome size-based selection, which can be an important determinant of individual  
499 fitness for many insect species (Beukeboom 2018). While such compensatory growth  
500 has been seen in many species, it can also pose costs to individuals (Arendt et al.  
501 2001; Dmitriew and Rowe 2007; Auer et al. 2010). We found that individuals that  
502 were starved had a lower food conversion efficiency than non-starved individuals,  
503 which may suggest a physiological cost of compensatory growth. Adjustments in

504 consumption patterns to different starvation regimes have been revealed to be  
505 expressed in the next generation (McCue et al. 2017). However, patterns may differ  
506 depending on the developmental stage in which an individual is facing starvation,  
507 which needs to be further explored in *A. rosae*. Since we conducted the consumption  
508 assays for all larvae at the same developmental stage, we were able to disentangle  
509 the effect of starvation from effects due to differences in ontogeny (Nicieza and  
510 Álvarez 2009), in contrast to earlier studies on this sawfly (Paul et al. 2019).

511

### 512 *Effects of Parental Reproductive Environment*

513 Unlike starvation and in contrast to our expectation, clerodanoid uptake, which is  
514 known to enhance mate attractiveness in *A. rosae* (Amano et al. 1999; preprint Paul  
515 and Müller 2021), had no effect on the measured traits in offspring of both sexes.  
516 This is surprising, because partner attractiveness can affect investment in offspring  
517 or/and offspring traits (Robart and Sinervo 2019), sometimes having  
518 multigenerational consequences (Gilbert et al. 2012). In other species, mating with  
519 more attractive partners can lead to direct effects for the partner, but not necessarily  
520 for the offspring. For example, in the field cricket, *Gryllus firmus*, mating with more  
521 attractive males led to a higher number of eggs laid by females but offspring did not  
522 show any fitness benefits (Kelly and Adam-Granger 2020). In *A. rosae*, parental  
523 clerodanoid exposure may affect other offspring traits, such as immunity (Bozov et al.  
524 2015), lifespan (Zanchi et al. 2021), or traits exhibited in adulthood, e.g. mating  
525 success (Amano et al. 1999; preprint Paul and Müller 2021), that were not measured  
526 in our study.

527

### 528 *Effects on Gene Expression*

529 Similar to the findings for life-history and consumption, transcriptome analysis of  
530 male larvae of the offspring generation also revealed stronger intra- than

531 intergenerational effects of larval starvation on gene expression, in line with our  
532 hypothesis. When offspring larvae were starved, about half of the genes were  
533 differentially expressed compared to non-starved larvae. As typical stress response  
534 indicators, genes putatively encoding heat shock proteins and cytochrome P450s  
535 were differentially expressed, being both up- and down-regulated in *A. rosae* in  
536 response to starvation. Regulation of heat shock proteins in response to starvation  
537 has been reported elsewhere, including in larvae of Lepidoptera and Hymenoptera  
538 (Farahani et al. 2020; Wang et al. 2012). These proteins act to stabilize and protect  
539 other proteins in the face of both abiotic and biotic stresses (Sørensen et al. 2003;  
540 Farahani et al. 2020). Cytochrome P450s are best known for their role in metabolism  
541 of xenobiotics by insects (Feyereisen 2012). However, they were also found to be  
542 more highly expressed in *D. melanogaster* flies selected for starvation resistance  
543 compared to controls (Doroszuk et al. 2012). In addition, genes putatively encoding  
544 the monoamines octopamine and tyramine were upregulated in starved larvae of *A.*  
545 *rosae*, both of which play a key role in modulating behavioral and physiological  
546 processes in invertebrates and can be involved in starvation resistance (Li et al.  
547 2016).

548 Furthermore, starvation of the offspring led to differential gene expression of  
549 pathways involved in metabolism, including pancreatic secretion, which was also  
550 found in starved larvae of the cotton bollworm, *Helicoverpa armigera* (Lepidoptera:  
551 Noctuidae) (Jiang et al. 2019). In starved larvae of *A. rosae*, differential regulation of  
552 metabolic pathways may explain why these larvae showed an overall lower food  
553 conversion efficiency compared to non-starved larvae. Moreover, expression of  
554 metabolic genes likely changes with the duration of starvation. For example, in *D.*  
555 *melanogaster* a 16 h starvation period led to downregulation particularly of the  
556 endopeptidase gene family (Moskalev et al. 2015), but extended periods of starvation  
557 may induce an activation of proteolysis genes. However, little is known about long-

558 term effects across generations, on gene expression patterns in response to  
559 starvation. Interestingly, many of the genes differentially expressed in starved vs non-  
560 starved individuals of *A. rosae* linked to the mitochondria, reflecting wholesale  
561 disruption of homeostasis caused by starvation (Gilbert 2012).

562 Parental starvation also caused differential expression in about 1 % of genes in *A.*  
563 *rosae* offspring, indicating that subtle intergenerational imprints on gene expression  
564 can occur. When only parental, but not offspring, treatment differed, offspring from  
565 starved parents displayed a downregulation of the ribosomal pathway compared to  
566 offspring of non-starved parents. In contrast, when only offspring treatment differed,  
567 larval starvation caused a comparative enrichment of genes in this pathway. These  
568 results indicate that larval starvation can have significant direct effects on the  
569 regulation of ribosomal proteins, but that these effects may be buffered to some  
570 degree via parental starvation. Starved larvae from non-starved parents may have  
571 been more physiologically stressed than starved larvae from starved parents, as  
572 indicated by the enrichment of putative ribosomal pathway genes. Differential  
573 regulation of genes in this pathway has been observed in a wide variety of taxa in  
574 response to thermal stress (Paraskevopoulou et al. 2020; Schwanz et al. 2020;  
575 Srikanth et al. 2020), demonstrating the broad role of this pathway in stress  
576 response. Importantly, the differential expression of genes involved in stress and  
577 other physiological and metabolic responses may have energetic costs, which may  
578 contribute to a prolonged development time of starved larvae in *A. rosae*.

579 Alteration in genes encoding ribosomal proteins may also be an important  
580 mechanism mediating intergenerational effects of starvation (Aldrich and Maggert  
581 2015; Bughio and Maggert 2019). In *Caenorhabditis elegans* starvation led to the  
582 generation of small RNAs, and small RNA-induced gene silencing persisted over up  
583 to three generations (Rechavi et al. 2014). Such mechanisms may also explain the  
584 intergenerational changes in gene expression observed in *A. rosae* in the present

585 study; future work comparing small RNA expression in relation to starvation could  
586 address this.

### 587 *Conclusions*

588 In summary, our findings highlight that intragenerational starvation effects were  
589 somewhat stronger than the intergenerational effects of starvation across life-history,  
590 consumption, and gene expression patterns. We found some evidence for parental  
591 effects including match-mismatch and parental buffering or parental suffering, while  
592 there was no clear evidence for silver spoon effects. The parental reproductive  
593 environment left no signature on the measured offspring traits. Due to different  
594 trajectories and environments experienced during different stages, distinct niches are  
595 realized, which are expressed in diverse phenotypes. Our results suggest that  
596 periods of starvation may make individuals more robust when facing another food  
597 shortage in the next generation and may, in the case of herbivorous pest insects,  
598 lead to enhanced damage of crops.

599

### 600 **Acknowledgments**

601 This study was funded by the German Research Foundation (DFG) as part of the  
602 SFB TRR 212 (NC<sup>3</sup>), project number 396777467 (granted to CM). We also thank  
603 University of Potsdam AG Genetics and AG Evolutionary Adaptive Genomics for use  
604 of computational resources and to Dr Tobias Busche and Katrin Lehmann for  
605 assistance with RNA extraction.

606

### 607 **Data availability**

608 All data and code of this manuscript will be deposited online on Dryad (DOI  
609 <https://doi.org/10.5061/dryad.73n5tb2x0>).

610 Raw Reads: SRA ID = PRJNA716060. BioSample accession numbers =

611 SAMN18393262-SAMN18393285

612

613

### Author contributions

614 Conceptualization and funding acquisition: CM; methods development/experimental  
615 design: SCP, CM; data collection: SCP, data validation and analysis: life history data:  
616 SCP, consumption assay data: SCP, PS, gene expression data: SCP, ABD; data  
617 visualization: SCP, PS; writing original draft: SCP, CM, PS; reviewing and editing:  
618 SCP, PS, ABD, CM.

619

620

### Supplemental Material

621 S1. Full Breeding Design of Experimental Animals  
622 S2. Effects of Starvation on Life-History Traits of Parental Generation  
623 S3. KEGG Term Analysis  
624 S4. Results of Posthoc Analyses for Offspring Generation  
625 S5: Influence of Parental and Offspring Larval Starvation Treatments on  
626 Developmental Times of *Athalia rosae* in Offspring Generation  
627 S6. Effects of Predictor Variables and Their Interactions on Consumption Traits.  
628 S7. Percentage of Differentially Expressed Genes  
629 S8. Numbers of Significantly Up- or Downregulated Genes  
630 S9. Mapped reads, DE output.  
631 S10. Unmapped reads, DE output.  
632 S11. KEGG pathway results.

633

634

### Literature Cited

635 Aldrich, J. C., and K. A. Maggert. 2015. Transgenerational inheritance of diet-induced  
636 genome rearrangements in *Drosophila*. *Plos Genetics* 11:e1005148.  
637 Amano, T., R. Nishida, Y. Kuwahara, and H. Fukami. 1999. Pharmacophagous acquisition of  
638 cleodendrins by the turnip sawfly (*Athalia rosae ruficornis*) and their role in the mating  
639 behavior. *Chemoecology* 9:145-150.  
640 Andrews, S. 2010. FastQC: A Quality Control Tool for High Throughput Sequence Data.  
641 Available online at <http://www.bioinformatics.babraham.ac.uk/projects/fastqc>.



- 642 Arendt, J., D. S. Wilson, and E. Stark. 2001. Scale strength as a cost of rapid growth in  
643 sunfish. *Oikos* 93:95-100.
- 644 Auer, S. K., J. D. Arendt, R. Chandramouli, and D. N. Reznick. 2010. Juvenile compensatory  
645 growth has negative consequences for reproduction in Trinidadian guppies (*Poecilia*  
646 *reticulata*). *Ecology Letters* 13:998-1007.
- 647 Badyaev, A. V., and T. Uller. 2009. Parental effects in ecology and evolution: mechanisms,  
648 processes and implications. *Philosophical Transactions of the Royal Society B-Biological*  
649 *Sciences* 364:1169-1177.
- 650 Barnett, D. W., E. K. Garrison, A. R. Quinlan, M. P. Stromberg, and G. T. Marth. 2011.  
651 BamTools: a C++ API and toolkit for analyzing and managing BAM files. *Bioinformatics*  
652 27:1691-1692.
- 653 Benjamini, Y., and Y. Hochberg. 1995. Controlling the false discovery rate: a practical and  
654 powerful approach to multiple testing. *Journal of the Royal Statistical Society B* 57:289-  
655 300.
- 656 Beukeboom, L. W. 2018. Size matters in insects - an introduction. *Entomologia*  
657 *Experimentalis et Applicata* 166:2-3.
- 658 Boggs, C. L., and K. Niitepõld. 2016. Effects of larval dietary restriction on adult morphology,  
659 with implications for flight and life history. *Entomologia Experimentalis et Applicata*  
660 159:189-196.
- 661 Bolger, A. M., M. Lohse, and B. Usadel. 2014. Trimmomatic: a flexible trimmer for Illumina  
662 sequence data. *Bioinformatics* 30:2114-2120.
- 663 Bozov, P., T. Girova, N. Prasadova, Y. Hristova, and V. Gochev. 2015. Antimicrobial activity  
664 of neo-clerodane diterpenoids isolated from Lamiaceae species against pathogenic and  
665 food spoilage microorganisms. *Natural Product Communications* 10:1797-1800.
- 666 Bughio, F., and K. A. Maggert. 2019. The peculiar genetics of the ribosomal DNA blurs the  
667 boundaries of transgenerational epigenetic inheritance. *Chromosome Research* 27:19-30.
- 668 Burton, T., and N. B. Metcalfe. 2014. Can environmental conditions experienced in early life  
669 influence future generations? *Proceedings of the Royal Society B-Biological Sciences*  
670 281:20140311.
- 671 Charles, J. G., and D. J. Allan. 2000. Development of the willow sawfly, *Nematus oligospilus*,  
672 at different temperatures, and an estimation of voltinism throughout New Zealand. *New*  
673 *Zealand Journal of Zoology* 27:197-200.
- 674 Cornwallis, C. K., and E. A. O'Connor. 2009. Sperm: seminal fluid interactions and the  
675 adjustment of sperm quality in relation to female attractiveness. *Proceedings of the Royal*  
676 *Society B-Biological Sciences* 276:3467-3475.
- 677 Crawley, M. J. 2012, *The R book*, John Wiley & Sons.
- 678 Cunningham, E. J. A., and A. F. Russell. 2000. Egg investment is influenced by male  
679 attractiveness in the mallard. *Nature* 404:74-77.
- 680 Dmitriew, C., and L. Rowe. 2007. Effects of early resource limitation and compensatory  
681 growth on lifetime fitness in the ladybird beetle (*Harmonia axyridis*). *Journal of*  
682 *Evolutionary Biology* 20:1298-1310.
- 683 Dobin, A., C. A. Davis, F. Schlesinger, J. Drenkow, C. Zaleski, S. Jha, P. Batut et al. 2013.  
684 STAR: ultrafast universal RNA-seq aligner. *Bioinformatics* 29:15-21.
- 685 Doroszuk, A., M. J. Jonker, N. Pul, T. M. Breit, and B. J. Zwaan. 2012. Transcriptome  
686 analysis of a long-lived natural *Drosophila* variant: a prominent role of stress- and  
687 reproduction-genes in lifespan extension. *BMC Genomics* 13:167.
- 688 English, S., and A. M. G. Barreux. 2020. The evolution of sensitive periods in development:  
689 insights from insects. *Current Opinion in Behavioral Sciences* 36:71-78.
- 690 Engqvist, L., and K. Reinhold. 2016. Adaptive trans-generational phenotypic plasticity and  
691 the lack of an experimental control in reciprocal match/mismatch-experiments. *Methods in*  
692 *Ecology & Evolution* 7:1482-1488.
- 693 Esperk, T., T. Tammaru, and S. Nylin. 2007. Intraspecific variability in number of larval  
694 instars in insects. *Journal of Economic Entomology* 100:627-645.
- 695 Etebari, K., K. R. Lindsay, A. L. Ward, and M. J. Furlong. 2020. Australian sugarcane soldier  
696 fly's salivary gland transcriptome in response to starvation and feeding on sugarcane  
697 crops. *Insect Science* 27:708-720.
- 698 Farahani, S., A. R. Bandani, H. Alizadeh, S. H. Goldansaz, and S. Whyard. 2020. Differential  
699 expression of heat shock proteins and antioxidant enzymes in response to temperature,

- 700 starvation, and parasitism in the Carob moth larvae, *Ectomyelois ceratoniae* (Lepidoptera:  
701 Pyralidae). Plos One 15:e0228104.
- 702 Feyereisen, R. 2012. Insect CYP genes and P450 enzymes, Pages 236–316 in I. G.  
703 Lawrence, ed. Insect Molecular Biology and Biochemistry. San Diego, USA, Academic  
704 Press.
- 705 Franzke, A., and K. Reinhold. 2013. Transgenerational effects of diet environment on life-  
706 history and acoustic signals of a grasshopper. Behavioral Ecology 24:734-739.
- 707 Gilbert, L. I. 2012, Insect Molecular Biology and Biochemistry. Amsterdam, Elsevier.
- 708 Gilbert, L., K. A. Williamson, and J. A. Graves. 2012. Male attractiveness regulates daughter  
709 fecundity non-genetically via maternal investment. Proceedings of the Royal Society B-  
710 Biological Sciences 279:523-528.
- 711 Grabherr, M. G., B. J. Haas, M. Yassour, J. Z. Levin, D. A. Thompson, I. Amit, X. Adiconis et  
712 al. 2011. Full-length transcriptome assembly from RNA-Seq data without a reference  
713 genome. Nature Biotechnology 29:644-U130.
- 714 Hector, K. L., and S. Nakagawa. 2012. Quantitative analysis of compensatory and catch-up  
715 growth in diverse taxa. Journal of Animal Ecology 81:583-593.
- 716 Hibshman, J. D., A. Hung, and L. R. Baugh. 2016. Maternal diet and insulin-like signaling  
717 control intergenerational plasticity of progeny size and starvation resistance. Plos  
718 Genetics 12:e1006396.
- 719 Hothorn, T., F. Bretz, and P. Westfall. 2008. Simultaneous inference in general parametric  
720 models. Biometrical Journal 50:346-363.
- 721 Jiang, T., L. Ma, X. Y. Liu, H. J. Xiao, and W. N. Zhang. 2019. Effects of starvation on  
722 respiratory metabolism and energy metabolism in the cotton bollworm *Helicoverpa*  
723 *armigera* (Hubner) (Lepidoptera: Noctuidae). Journal of Insect Physiology 119:103951.
- 724 Kelly, C. D., and É. Adam-Granger. 2020. Mating with sexually attractive males provides  
725 female *Gryllus firmus* field crickets with direct but not indirect fitness benefits. Behavioral  
726 Ecology and Sociobiology 74:80.
- 727 Kuznetsova, A., Brockhoff, P.B., Christensen, R.H.B. 2017. lmerTest Package: Tests in  
728 Linear Mixed Effects Models. Journal of Statistical Software 82:1-26.
- 729 Le Roy, A., I. Loughland, and F. Seebacher. 2017. Differential effects of developmental  
730 thermal plasticity across three generations of guppies (*Poecilia reticulata*): canalization  
731 and anticipatory matching. Scientific Reports 7:4313.
- 732 Li, B., and C. N. Dewey. 2011. RSEM: accurate transcript quantification from RNA-Seq data  
733 with or without a reference genome. BMC Bioinformatics 12:323.
- 734 Li, H., B. Handsaker, A. Wysoker, T. Fennell, J. Ruan, N. Homer, G. Marth et al. 2009. The  
735 Sequence Alignment/Map format and SAMtools. Bioinformatics 25:2078-2079.
- 736 Li, Y., J. Hoffmann, F. Stephano, I. Bruchhaus, C. Fink, and T. Roeder. 2016. Octopamine  
737 controls starvation resistance, life span and metabolic traits in *Drosophila*. Scientific  
738 Reports 6:35359.
- 739 Love, M. I., W. Huber, and S. Anders. 2014. Moderated estimation of fold change and  
740 dispersion for RNA-seq data with DESeq2. Genome Biology 15:550.
- 741 Luke, S. G. 2017. Evaluating significance in linear mixed-effects models in R. Behavior  
742 Research Methods 49:1494-1502.
- 743 Luo, W. J., and C. Brouwer. 2013. Pathview: an  
744 R/Bioconductor package for pathway-based data integration and visualization.  
Bioinformatics 29:1830-1831.
- 745 Luo, W. J., M. S. Friedman, K. Shedden, K. D. Hankenson, and P. J. Woolf. 2009. GAGE:  
746 generally applicable gene set enrichment for pathway analysis. BMC Bioinformatics  
747 10:161.
- 748 McCue, M. D., J. S. Terblanche, and J. B. Benoit. 2017. Learning to starve: impacts of food  
749 limitation beyond the stress period. Journal of Experimental Biology 220:4330-4338.
- 750 Miyatake, T. 2001. Effects of starvation on death-feigning in adults of *Cylas formicarius*  
751 (Coleoptera: Brentidae). Annals of the Entomological Society of America 94:612-616.
- 752 Monaghan, P. 2008. Early growth conditions, phenotypic development and environmental  
753 change. Philosophical Transactions of the Royal Society B-Biological Sciences 363:1635-  
754 1645.
- 755 Moriya, Y., M. Itoh, S. Okuda, A. C. Yoshizawa, and M. Kanehisa. 2007. KAAS: an automatic  
756 genome annotation and pathway reconstruction server. Nucleic Acids Research 35:W182-  
757 W185.

- 758 Moskalev, A., S. Zhikrivetskaya, G. Krasnov, M. Shaposhnikov, E. Proshkina, D.  
759 Borisoglebsky, A. Danilov et al. 2015. A comparison of the transcriptome of *Drosophila*  
760 *melanogaster* in response to entomopathogenic fungus, ionizing radiation, starvation and  
761 cold shock. BMC Genomics 16(Supple 13):S8.
- 762 Naguib, M., A. Nemitz, and D. Gil. 2006. Maternal developmental stress reduces  
763 reproductive success of female offspring in zebra finches. Proceedings of the Royal  
764 Society B-Biological Sciences 273:1901-1905.
- 765 Naito, T., and H. Suzuki. 1991. Sex determination in the sawfly, *Athalia rosae* Ruficornis  
766 (Hymenoptera) - occurrence of triploid males. Journal of Heredity 82:101-104.
- 767 Nicieza, A. G., and D. Álvarez. 2009. Statistical analysis of structural compensatory growth:  
768 how can we reduce the rate of false detection? Oecologia 159:27-39.
- 769 Paraskevopoulou, S., A. B. Dennis, G. Weithoff, and R. Tiedemann. 2020. Temperature-  
770 dependent life history and transcriptomic responses in heat-tolerant versus heat-sensitive  
771 *Brachionus* rotifers. Scientific Reports 10:13281.
- 772 Paul, S. C., A. B. Dennis, L. J. Tewes, J. Friedrichs, and C. Müller. 2021. Consequences of  
773 pharmacophagous uptake from plants and conspecifics in a sawfly elucidated using  
774 chemical and molecular techniques. bioRxiv preprint. doi: 10.1101/2021.02.09.430406
- 775 Paul, S. C., and C. Müller. 2021. Fighting over defence chemicals disrupts mating behaviour.  
776 bioRxiv preprint. doi: 10.1101/2021.02.12.430958
- 777 Paul, S. C., R. Putra, and C. Müller. 2019. Early life starvation has stronger intra-generational  
778 than transgenerational effects on key life-history traits and consumption measures in a  
779 sawfly. Plos One 14:e0226519.
- 780 Perez, M. F., and B. Lehner. 2019. Intergenerational and transgenerational epigenetic  
781 inheritance in animals. Nature Cell Biology 21:143-151.
- 782 Pilakouta, N., S. Jamieson, J. A. Moorad, and P. T. Smiseth. 2015. Parental care buffers  
783 against inbreeding depression in burying beetles. Proceedings of the National Academy of  
784 Sciences of the United States of America 112:8031-8035.
- 785 Raveh, S., D. Vogt, and M. Kolliker. 2016. Maternal programming of offspring in relation to  
786 food availability in an insect (*Forficula auricularia*). Proceedings of the Royal Society B-  
787 Biological Sciences 283:20152936.
- 788 Rechavi, O., L. Hourri-Ze'evi, S. Anava, W. S. S. Goh, S. Y. Kerk, G. J. Hannon, and O.  
789 Hobert. 2014. Starvation-induced transgenerational inheritance of small RNAs in *C.*  
790 *elegans*. Cell 158:277-287.
- 791 Regalado, J. M., M. B. Cortez, J. Grubbs, J. A. Link, A. van der Linden, and Y. Zhang. 2017.  
792 Increased food intake after starvation enhances sleep in *Drosophila melanogaster*.  
793 Journal of Genetics and Genomics 44:319-326.
- 794 Riggert, E. 1939. Untersuchungen über die Rübenblattwespe *Athalia colobri* Christ (*A.*  
795 *spinarum* F.). Zeitschrift für angewandte Entomologie 26:462-516.
- 796 Robart, A. R., and B. Sinervo. 2019. Females increase parental care, but not fecundity, when  
797 mated to high-quality males in a biparental fish. Animal Behaviour 148:9-18.
- 798 Roberts, A., C. Trapnell, J. Donaghey, J. L. Rinn, and L. Pachter. 2011. Improving RNA-Seq  
799 expression estimates by correcting for fragment bias. Genome Biology 12:R22.
- 800 Roff, D. A. 1992, The evolution of life histories: Theory and analysis. New York, Chapman &  
801 Hall.
- 802 Saastamoinen, M., N. Hirai, and S. van Nouhuys. 2013. Direct and trans-generational  
803 responses to food deprivation during development in the Glanville fritillary butterfly.  
804 Oecologia 171:93-104.
- 805 Sánchez-Tójar, A., M. Lagisz, N. P. Moran, S. Nakagawa, D. W. A. Noble, and K. Reinhold.  
806 2020. The jury is still out regarding the generality of adaptive 'transgenerational' effects.  
807 Ecology Letters 23:1715-1718.
- 808 Sawa, M., A. Fukunaga, T. Naito, and K. Oishi. 1989. Studies on the sawfly, *Athalia rosae*  
809 (Insecta, Hymenoptera, Tenthredinidae) I. General biology. Zoological Science 6:541-547.
- 810 Schwanz, L. E., J. Crawford-Ash, and T. Gale. 2020. Context dependence of  
811 transgenerational plasticity: the influence of parental temperature depends on offspring  
812 environment and sex. Oecologia 194:391-401.
- 813 Soneson, C., M. Love, and M. Robinson. 2015. Differential analyses for RNA-seq: transcript-  
814 level estimates improve gene level inferences F1000Research 4:1521.
- 815 Sørensen, J. G., T. N. Kristensen, and V. Loeschcke. 2003. The evolutionary and ecological  
816 role of heat shock proteins. Ecology Letters 6:1025-1037.

- 817 Srikanth, K., J.-E. Park, S. Y. Ji, K. H. Kim, Y. K. Lee, H. Kumar, M. Kim et al. 2020.  
818 Genome-wide transcriptome and metabolome analyses provide novel insights and  
819 suggest a sex-specific response to heat stress in pigs. *Genes* 11:540.
- 820 Taborsky, B. 2017. Developmental plasticity: preparing for life in a complex world. *Advances*  
821 *in the Study of Behavior* 49:49-99.
- 822 Tarka, M., A. Guenther, P. T. Niemelä, S. Nakagawa, and D. W. A. Noble. 2018. Sex  
823 differences in life history, behavior, and physiology along a slow-fast continuum: a meta-  
824 analysis. *Behavioral Ecology and Sociobiology* 72:132.
- 825 Uller, T., S. Nakagawa, and S. English. 2013. Weak evidence for anticipatory parental effects  
826 in plants and animals. *Journal of Evolutionary Biology* 26:2161-2170.
- 827 Valtonen, T. M., K. Kangassalo, M. Pölkki, and M. J. Rantala. 2012. Transgenerational  
828 effects of parental larval diet on offspring development time, adult body size and pathogen  
829 resistance in *Drosophila melanogaster*. *PLoS One* 7:e31611.
- 830 van de Pol, M., L. W. Bruinzeel, D. Heg, H. P. van der Jeugd, and S. Verhulst. 2006. A silver  
831 spoon for a golden future: long-term effects of natal origin on fitness prospects of  
832 oystercatchers (*Haematopus ostralegus*). *Journal of Animal Ecology* 75:616-626.
- 833 Wang, H., K. Li, J. Y. Zhu, Q. Fang, G. Y. Ye, H. Wang, K. Li et al. 2012. Cloning and  
834 expression pattern of heat shock protein genes from the endoparasitoid wasp, *Pteromalus*  
835 *puparum* in response to environmental stresses. *Archives of Insect Biochemistry and*  
836 *Physiology* 79:247-263.
- 837 Wang, Y., O. Kaftanoglu, C. S. Brent, R. E. Page, and G. V. Amdam. 2016. Starvation stress  
838 during larval development facilitates an adaptive response in adult worker honey bees  
839 (*Apis mellifera* L.). *Journal of Experimental Biology* 219:949-959.
- 840 Wolf, J. B., and M. J. Wade. 2009. What are maternal effects (and what are they not)?  
841 *Philosophical Transactions of the Royal Society B-Biological Sciences* 364:1107-1115.
- 842 Yin, J. J., M. Zhou, Z. R. Lin, Q. S. Q. Li, and Y. Y. Zhang. 2019. Transgenerational effects  
843 benefit offspring across diverse environments: a meta-analysis in plants and animals.  
844 *Ecology Letters* 22:1976-1986.
- 845 Zanchi, C., L. K. Lo, R. R. I. Moritz, J. Kurtz, and C. Müller. 2021. Survival of the sawfly  
846 *Athalia rosae* upon infection by an entomopathogenic fungus and in relation to  
847 clerodanoid uptake. *Frontiers in Physiology*.
- 848 Zhu, A. Q., J. G. Ibrahim, and M. I. Love. 2019. Heavy-tailed prior distributions for sequence  
849 count data: removing the noise and preserving large differences. *Bioinformatics* 35:2084-  
850 2092.
- 851 Zizzari, Z. V., N. M. van Straalen, and J. Ellers. 2016. Transgenerational effects of nutrition  
852 are different for sons and daughters. *Journal of Evolutionary Biology* 29:1317-1327.

853

854 **Figures**

855 **Figure 1:**

856

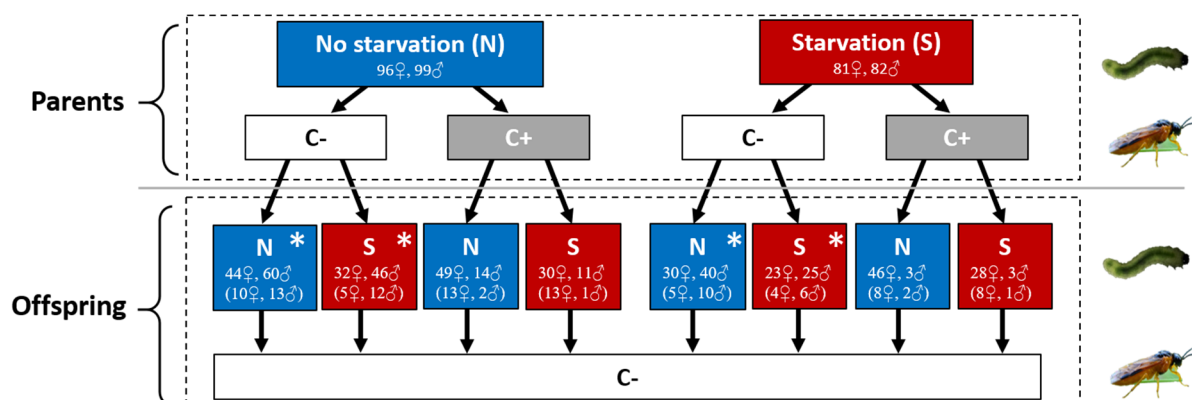

857 **Figure 1:** Design of experimental treatments with *Athalia rosae*; \* indicates  
858 individuals taken for RNASeq analysis. Sample sizes split by sex are given in boxes.

859 individuals taken for RNASeq analysis. Sample sizes split by sex are given in boxes.

860 Numbers in brackets refer to sample sizes for consumption assay (please note that

861 individuals were pooled across C+ and C- treatments). (For the full breeding design

862 see S1.)

863



864 **Figure 2**

865

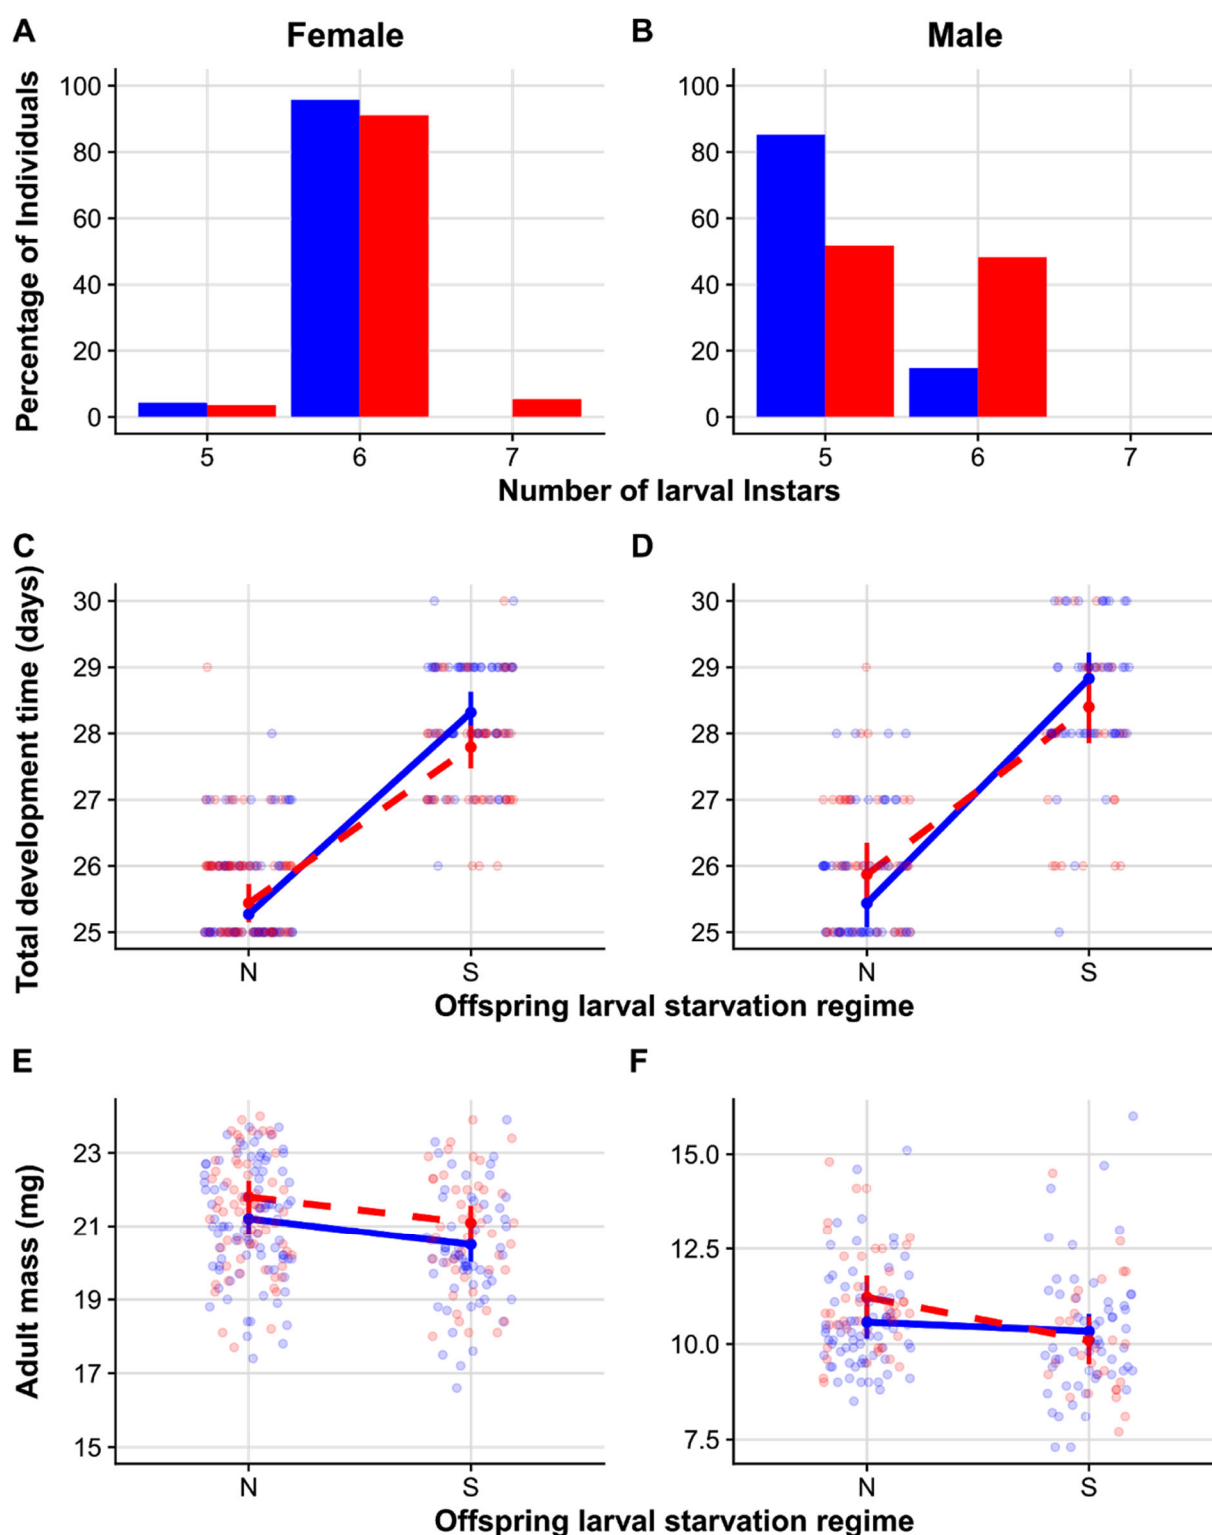

866

867 **Figure 2:** Number of larval instars in in dependence of offspring starvation treatment

868 (blue: non starved, red: starved) in percentage (A, B) and influence of offspring larval

869 starvation treatments (N = no starvation, S = starvation) and parental larval starvation

870 treatments (blue solid line = no starvation, red dashed line = starvation) on offspring

871 total development time (C, D) and adult body mass (E, F) of *Athalia rosae*. Data are  
872 plotted separately for females (A, C, E) and males (B, D, F); individuals were sexed  
873 on emergence. Points (C-F) are model predictions with associated confidence  
874 intervals and colors of points and lines correspond to parental starvation treatment.  
875 Raw data (C-F) are plotted in transparent colors in the background (blue circles – no  
876 parental starvation, red circles – parental starvation).  
877

878 **Figure 3**

879

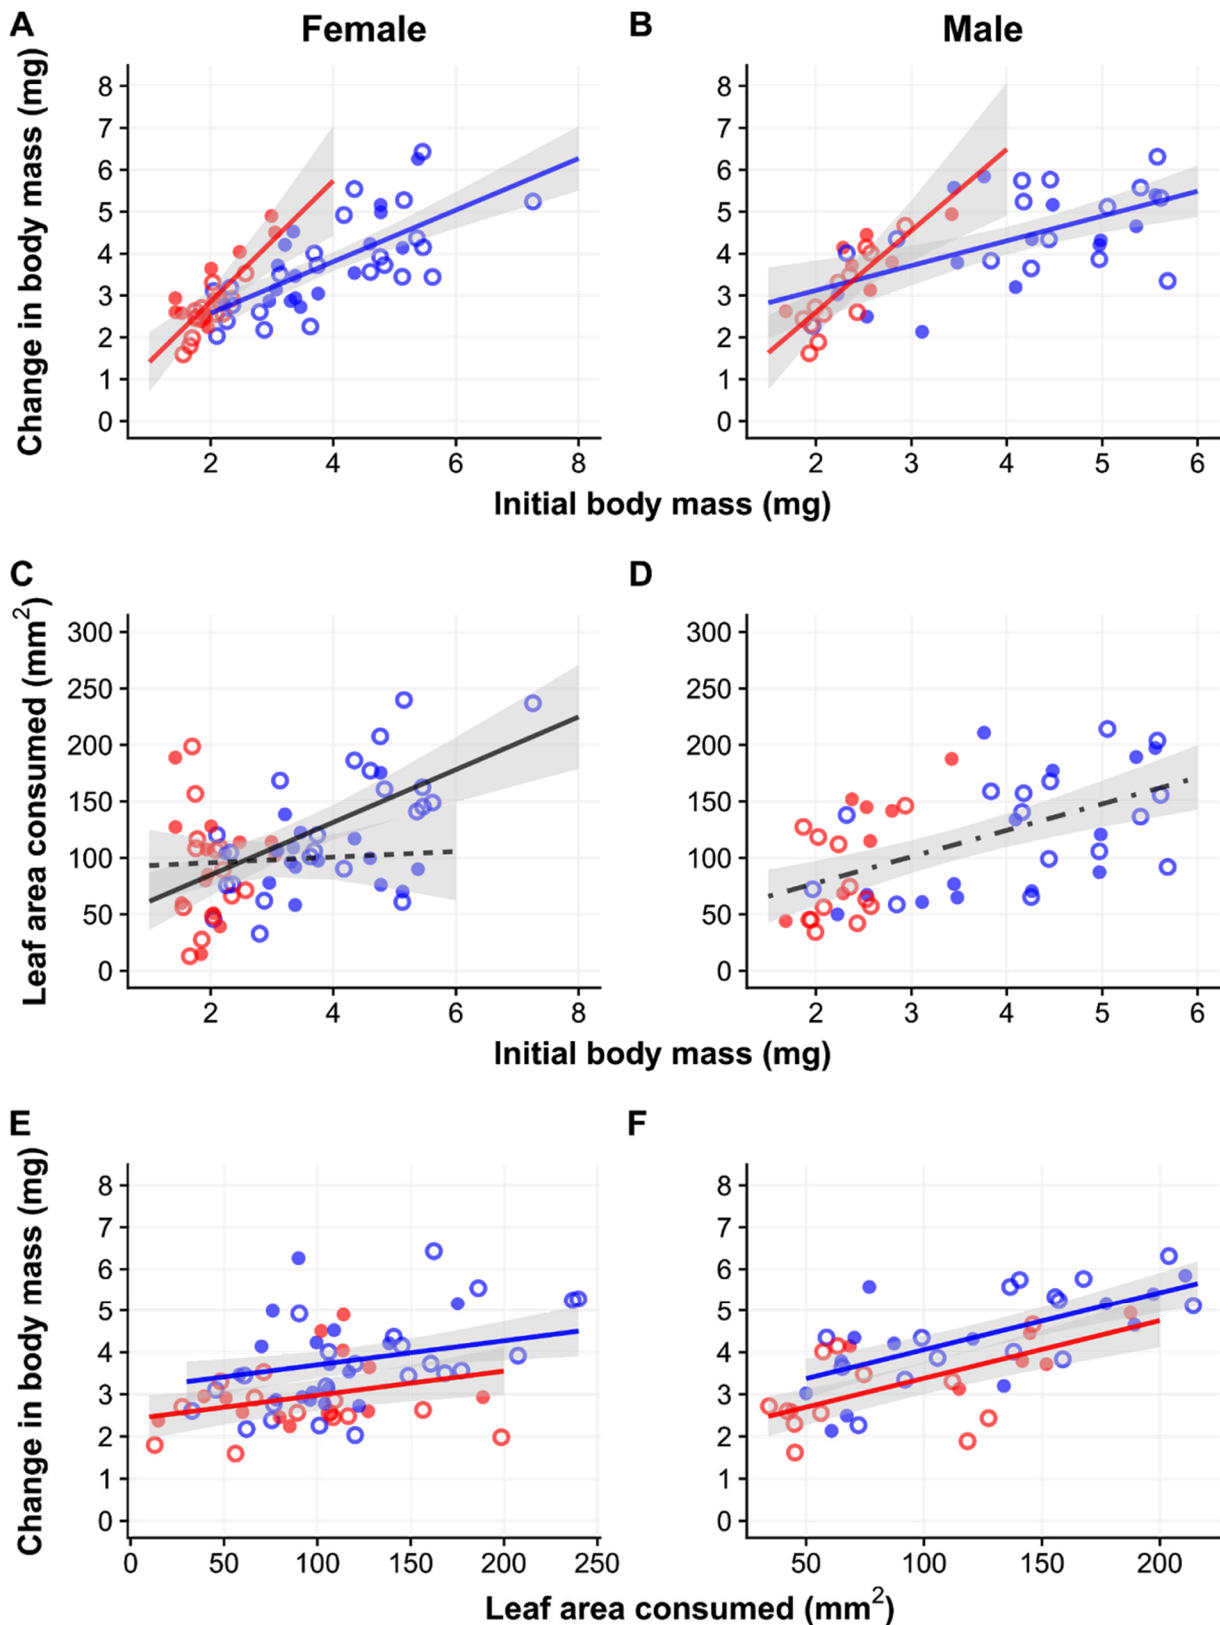

880

881 **Figure 3:** Relationship between initial body mass and change in body mass (relative

882 growth rate: A, B), initial body mass and leaf area consumed (relative consumption

883 rate: C, D), and leaf area consumed and change in body mass (consumption



884 efficiency: E, F) for 3<sup>rd</sup> instar *Athalia rosae* larvae (offspring generation). Circles  
885 represent raw data. Circle color denotes offspring larval starvation treatment  
886 (blue=no starvation, red=starvation). Circle type denotes parental larval starvation  
887 treatment (open circle=no starvation, filled circle =starvation). Lines depict minimum  
888 adequate model predictions with gray shaded regions showing the 95% confidence  
889 interval range. Offspring starvation treatment (blue line = no starvation, red line =  
890 starvation) had a significant effect on relative growth rate (interactively with initial  
891 body mass; A, B) and consumption efficiency (E, F). Parental starvation treatment  
892 (solid black line = no starvation, dashed black line = starvation) had a significant  
893 effect on relative consumption rate in females (interactively with initial body mass;  
894 C). Only initial body mass, but neither parental nor offspring starvation treatment had  
895 a significant effect on relative consumption rate in males (dot-dash line in D). Data  
896 are plotted separately for females (A, C, E) and males (B, D, F); individuals were  
897 sexed on emergence.  
898

899 **Figure 4**

**Offspring starvation treatments differ**

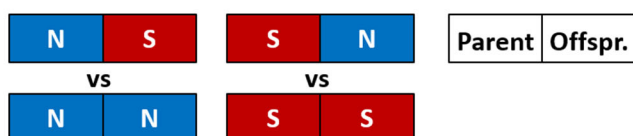

**Parental starvation treatments differ**

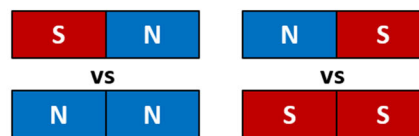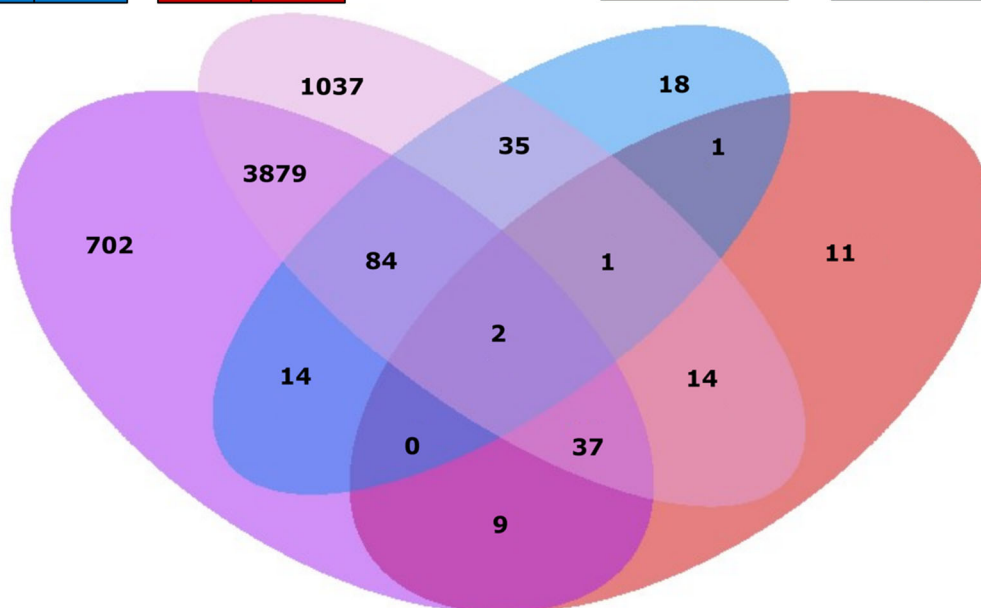

900

901

902 **Figure 4:** Venn diagram illustrating the number of unique and shared significantly  
 903 differentially expressed genes ( $p_{\text{adjust}} < 0.05$ ) in male offspring larvae of *Athalia*  
 904 *rosae* resulting from each of the four pairwise comparisons, (N = no starvation and S  
 905 = starvation; left box parental, right box offspring treatment).

906

907 **Figure 5**

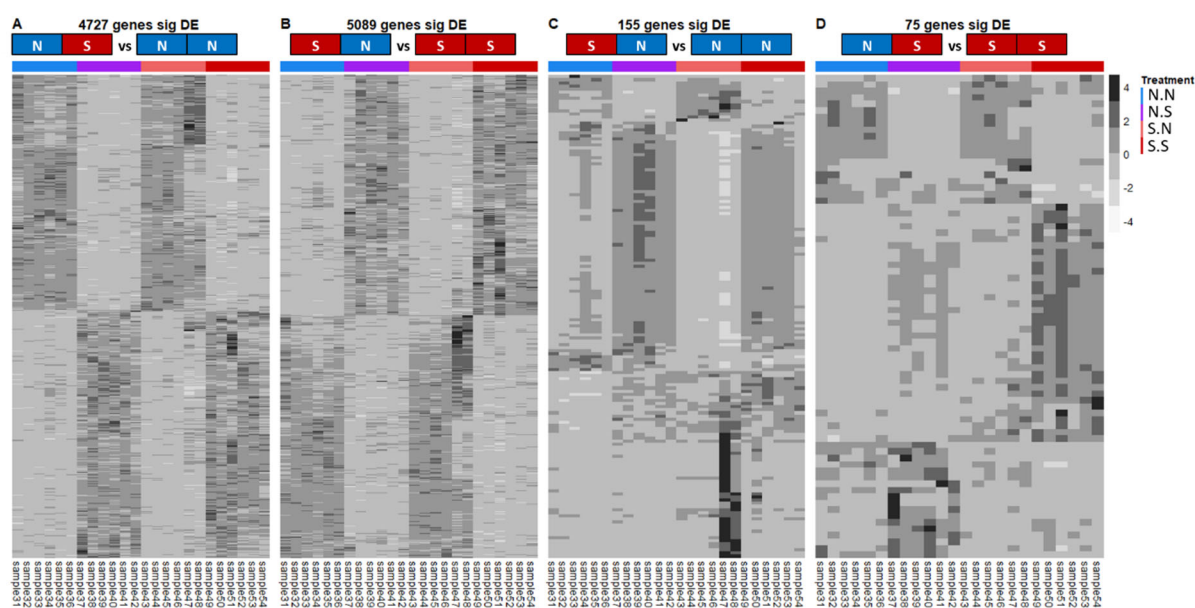

908

909 **Figure 5:** Heatmaps showing the expression (normalized counts) of genes in male  
910 offspring larvae of *Athalia rosae* across all samples for those genes that were  
911 significantly differentially expressed ( $p_{\text{adjust}} < 0.05$ ) when offspring starvation  
912 treatment differed (A, B) or parental starvation treatment differed (C, D), (N = no  
913 starvation and S = starvation; left box parental, right box offspring treatment). Plotted  
914 values are z-scores computed from normalized counts post clustering.

915

916 **Table 1.** Significantly differentially expressed KEGG gene sets/pathways male  
 917 offspring larvae of *Athalia rosae* that differed in either their own or their parent's larval  
 918 starvation regime (N = no starvation and S = two periods of starvation for 24 hours  
 919 during larval development; left box parental, right box offspring treatment). The  
 920 combination listed first (on top) is the 'treatment' the one listed second (underneath)  
 921 is the 'control' in each comparison, meaning that pathways are up- or downregulated  
 922 in 'treatment' relative to 'control'. Larvae undergoing starvation (S) were subjected to  
 923 two periods of starvation for 24 hours during larval development, one in 2<sup>nd</sup> and one  
 924 in 4<sup>th</sup> instar.

| KEGG pathway                                | Offspring starvation treatment differs |   |        |   | Parental starvation treatment differs |   |      |   |
|---------------------------------------------|----------------------------------------|---|--------|---|---------------------------------------|---|------|---|
|                                             | N                                      | S | S      | N | S                                     | N | N    | S |
|                                             | vs                                     |   | vs     |   | vs                                    |   | vs   |   |
|                                             | N                                      | N | S      | S | N                                     | N | S    | S |
| Ribosome                                    | ↑ up                                   |   | ↓ down |   | ↓ down                                |   | ↑ up |   |
| Pancreatic secretion                        | -                                      |   | ↓ down |   | -                                     |   | -    |   |
| Protein processing in endoplasmic reticulum | ↓ down                                 |   | ↑ up   |   | -                                     |   | -    |   |
| Proteasome                                  | ↓ down                                 |   | ↑ up   |   | -                                     |   | -    |   |
| Phagosome                                   | -                                      |   | ↑ up   |   | -                                     |   | -    |   |
| Citrate cycle                               | ↓ down                                 |   | -      |   | -                                     |   | -    |   |
| Glycolysis / Gluconeogenesis                | ↓ down                                 |   | -      |   | -                                     |   | -    |   |
| Antigen processing and presentation         | ↓ down                                 |   | ↑ up   |   | -                                     |   | -    |   |
| Protein export                              | ↓ down                                 |   | -      |   | -                                     |   | -    |   |
| ECM-receptor interaction                    | -                                      |   | ↑ up   |   | -                                     |   | -    |   |
| Thyroid hormone synthesis                   | -                                      |   | ↑ up   |   | -                                     |   | -    |   |

925
